# Supplementary material
Source: PubMed Central journal article supplement (PMC4770890)
Supplement: NIHMS761262-supplement-Supplemental_Information.pdf [file NIHMS761262-supplement-Supplemental_Information.pdf]

Supporting Information for

**Solid-state Nuclear Magnetic  
Resonance on the Static and Dynamic  
Domains of Huntingtin Exon-1 Fibrils**

J. Mario Isas, Ralf Langen, Ansgar B. Siemer

Department of Biochemistry and Molecular Biology, Zilkha Neurogenetic Institute, Keck School of  
Medicine, University of Southern California, 1501 San Pablo St., Los Angeles CA 90033, USA

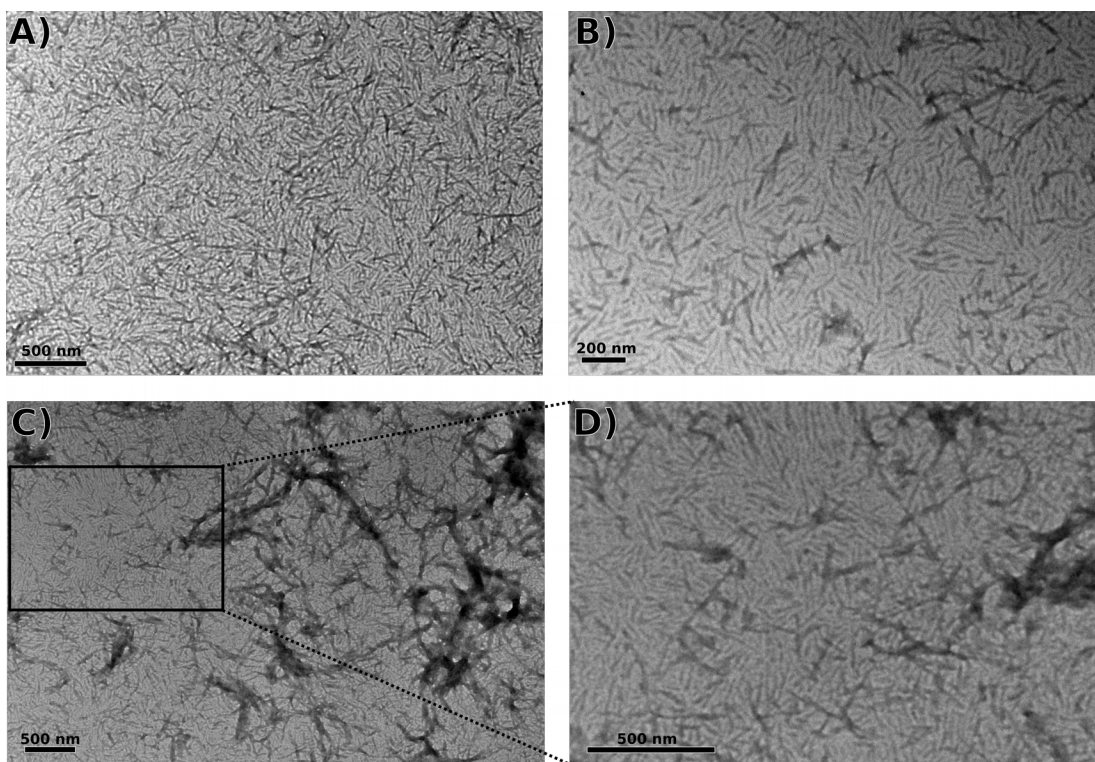

**S 1 Figure:** EM images of  $\text{htt}_{\text{ex1}}$  fibrils prepared at  $4^\circ\text{C}$ . Although the majority of the fibrils is unbundled as seen in the images shown in A), B), and D), there is occasional bundling observed as seen in image C). To prepare the EM samples,  $6\ \mu\text{l}$  of fibrils were adsorbed onto copper mesh electron microscopy grids (Electron Microscopy Sciences, Hatfield, PA) for 2 min. These grids were negatively stained for 2 min with 2% uranyl acetate. Electron micrographs were taken using a Gatan digital camera on a JEOL JEM-1400 electron microscope (JEOL, Peabody, MA) at 100 kV.

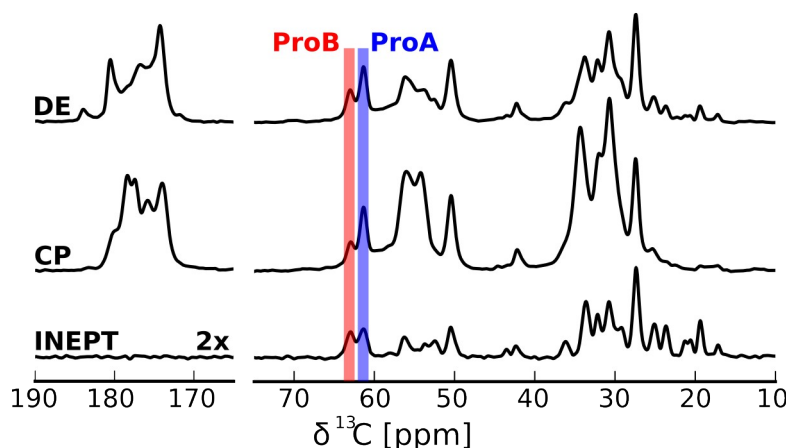

**S 2 Figure:** Pro A is dominant in the static domains of  $\text{htt}_{\text{ex1}}$ .  $1\text{D}\ ^{13}\text{C}$  spectra of  $\text{htt}_{\text{ex1}}$  recorded using direct excitation (DE), cross polarization (CP), and a refocused INEPT pulse sequence to create the initial  $^{13}\text{C}$  magnetization. Where Pro A has the twice the intensity of Pro B in the CP spectra sensitive to the static parts of the fibril, Pro A and Pro B are found of almost equal intensity in the INEPT spectra sensitive to the dynamic domains of  $\text{htt}_{\text{ex1}}$ .

**S 3 Table:**  $^{15}\text{N}$  and  $^{13}\text{C}$  chemical shift assignment of the resonances identified in the htt<sub>ex1</sub> fibril samples. All chemical shifts were referenced externally to DSS using adamantane.

| Residue | N     | C     | CA   | CB   | CG        | CD        | CE/CZ | NE2   |
|---------|-------|-------|------|------|-----------|-----------|-------|-------|
| Gln A   | 119.3 | 175.8 | 56.1 | 34.2 | 34.1      | 178.5     |       | 108.6 |
| Gln B   | 116.6 | 173.9 | 54.0 | 31.8 | 29.9      | 177.4     |       | 105.7 |
| Gln C   | -     | 173.8 | 53.4 | 29.1 | 33.5      | 180.5     |       |       |
| Pro A   | -     | 174.3 | 61.2 | 30.6 | 27.3      | 50.2      |       |       |
| Pro B   | -     | 176.6 | 62.9 | 32.1 | 27.3      | 50.4      |       |       |
| Glu     | -     | -     | -    | 30.5 | 36.3      | 183.8     |       |       |
| Ala     | -     | 177.5 | 52.3 | 19.3 |           |           |       |       |
| Leu     | -     | -     | -    | 42.3 | 26.9      | 25.1/23.6 |       |       |
| Val     | -     | -     | 62.8 | 33.0 | 21.2/20.5 |           |       |       |
| Arg     | -     | -     | -    | -    | -         | 43.4      | 159.2 |       |
| His     | -     | 175.9 | 56.3 | 30.9 | -         | 119.9     | 138.6 |       |
| Met     | -     | -     | -    | -    | -         | -         | 17.0  |       |
| Lys     | -     | -     | -    | -    | -         | 29.1      | 42.1  |       |

**S 4 Table:**  $^1\text{H}$  chemical shift assignment of the resonances identified in the htt<sub>ex1</sub> fibril samples. All chemical shifts were referenced externally to DSS using adamantane.

| Residue | HA   | HB        | HG        | HD        | HE   |
|---------|------|-----------|-----------|-----------|------|
| Gln C   | 4.61 | 1.95/2.12 | 2.45      |           |      |
| Pro A   | 4.79 | 2.32      | 2.00      | 3.62      |      |
| Pro B   | 4.43 | 2.38      | 2.01      | 3.77      |      |
| Ala     | 4.31 | 1.35      |           |           |      |
| Leu     | 4.66 | 1.60      | 1.61      | 0.90/0.94 |      |
| Val     | 3.74 | 2.06      | 0.95/0.94 |           |      |
| Arg     | -    | -         | -         | 3.14      |      |
| His     | 4.55 | 3.04      | -         | -         |      |
| Met     | -    | -         | -         | -         | 2.09 |
| Lys     | -    | -         | -         | -         | 3.05 |
